# Supplementary material for: The first enantioselective total synthesis of the anti-Helicobacter pylori agent (+)-spirolaxine methyl ether
Source: Royal Society of Chemistry journal article supplement (doi:10.1039/b418106a), 2005-01-01
Supplement: b418106a.pdf [file b418106a.pdf]

## ELECTRONIC SUPPLEMENTARY INFORMATION (ESI)

### The First Enantioselective Total Synthesis of the Anti-*Helicobacter Pylori* Agent (+)-Spirolaxine Methyl Ether

James E. Robinson and Margaret A. Brimble\*

Department of Chemistry, The University of Auckland, 23 Symonds St., Auckland, New Zealand.  
E-mail: [m.brimble@auckland.ac.nz](mailto:m.brimble@auckland.ac.nz); Fax: +64 9 3737599; tel; +64 9 3737599 ext 88259

#### Experimental Details

#### (3*R*, 2''*R*, 5''*R*, 7''*R*)-5,7-Dimethoxy-3-[5'-(2''-methyl-1'',6''-dioxaspiro[4.5]dec-7''-yl)pent-3'-enyl]-3*H*-isobenzofuran-1-one

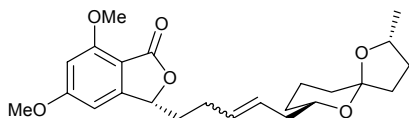

Sulphone **3** (150 mg, 0.39 mmol) was dissolved in tetrahydrofuran (7.5 cm<sup>3</sup>) and cooled to -78 °C under an atmosphere of nitrogen. To this stirred solution was added dropwise lithium diisopropylamine (0.43 cm<sup>3</sup>, 0.43 mmol, 1 mol dm<sup>-3</sup>). The resultant deep yellow solution was stirred for 0.75 h before the dropwise addition of aldehyde **4** (98 mg, 0.39 mmol) in tetrahydrofuran (2.5 cm<sup>3</sup>). After stirring at -78 °C for 4 h the solution was allowed to slowly warm to room temperature and was stirred for a further 0.75 h. The reaction was quenched by the addition of brine (3 cm<sup>3</sup>) and the aqueous layer was extracted with ethyl acetate (3 x 15 cm<sup>3</sup>). The combined extracts were dried over magnesium sulfate, filtered and the solvent removed *in vacuo*. The resultant oil was purified by flash column chromatography using hexane-ethyl acetate (9:1-1:1) as the eluent to give the *title compound* (65 mg, 40%) as a yellow oil; [ $\alpha$ ]<sub>D</sub> +58.6 (*c* 0.97 in CH<sub>3</sub>Cl);  $\nu_{\max}$ (film)/cm<sup>-1</sup> 2929, 1758s (CO), 1613s, 1462, 1338, 1218, 1159, 1056 and 980;  $\delta_{\text{H}}$  (400 MHz, CDCl<sub>3</sub>): 1.08-1.30 (2 H, m, H8''<sub>a</sub> and H8''<sub>a</sub>\*), 1.21 (3 H, d, *J* = 6.3 Hz, Me), 1.22 (3 H, d, *J* = 6.3 Hz, Me\*), 1.34-1.42 (2 H, m, H3''<sub>a</sub> and H3''<sub>a</sub>\*), 1.55-1.59 (2 H, m, H8''<sub>b</sub> and H8''<sub>b</sub>\*), 1.62-1.67 (6 H, m, H9''<sub>a</sub>, H9''<sub>a</sub>\*, H10'' and H10''\*), 1.70-1.79 (4 H, m, H4''<sub>a</sub>, H4''<sub>a</sub>\*, H1''<sub>a</sub> and H1''<sub>a</sub>\*), 1.80-1.89 (4 H, m, H4''<sub>b</sub>, H4''<sub>b</sub>\*, H9''<sub>b</sub> and H9''<sub>b</sub>\*), 1.96-2.03 (2 H, m, H1''<sub>b</sub> and H1''<sub>b</sub>\*), 2.03-2.11 (4 H, m, (*E*)-H5''<sub>a</sub>, (*E*)-H5''<sub>a</sub>\*, H3''<sub>b</sub> and H3''<sub>b</sub>\*), 2.12-2.17 (4 H, m, (*E*)-H5''<sub>b</sub>, (*E*)-H5''<sub>b</sub>\*, (*Z*)-H5'' and (*Z*)-H5''\*), 2.18-2.25 (4 H, m, (*E*)-H2''

(*E*)-H2'\* , (*Z*)-H2'<sub>a</sub> and (*Z*)-H2'<sub>a</sub>\*, 2.26-2.34 (2 H, m, (*Z*)-H2'<sub>b</sub> and (*Z*)-H2'<sub>b</sub>\*), 3.71-3.80 (2 H, m, H7'' and H7''\*), 3.89 (3 H, s, OMe), 3.89 (3 H, s, OMe\*), 3.95 (6 H, s, OMe and OMe\*), 4.13 (1 H, qd, *J* = 6.3 and 6.3 Hz, H2''), 4.15 (1 H, qd, *J* = 6.3 and 6.3 Hz, H2''\*), 5.31 (1 H, dd, *J* = 8.3 and 3.4 Hz, H3), 5.33 (1 H, dd, *J* = 8.3 and 3.4, H3\*), 5.41-5.55 (4 H, m, H3', H3'\*, H4' and H4'\*), 6.40-6.41 (2 H, m, H6 and H6\*), 6.42 (2 H, s, H4 and H4\*);  $\delta_C$  (100 MHz, CDCl<sub>3</sub>): 20.3 (CH<sub>2</sub>, C9''), 20.3 (CH<sub>2</sub>, C9''\*), 21.1 (CH<sub>3</sub>, Me), 21.2 (CH<sub>3</sub>, Me\*), 22.8 (CH<sub>2</sub>, (*Z*)-C2'), 27.8 (CH<sub>2</sub>, (*E*)-C2'), 30.4 (CH<sub>2</sub>, C8''), 31.3 (CH<sub>2</sub>, C3''), 33.4 (CH<sub>2</sub>, C10''), 33.5 (CH<sub>2</sub>, C10''\*), 34.0 (CH<sub>2</sub>, (*Z*)-C5'), 34.8 (CH<sub>2</sub>, C1'), 34.8 (CH<sub>2</sub>, C1'\*), 38.0 (CH<sub>2</sub>, C4''), 38.0 (CH<sub>2</sub>, C4''\*), 39.5 (CH<sub>2</sub>, (*E*)-C5'), 55.9 (CH<sub>3</sub>, OMe), 56.0 (CH<sub>3</sub>, OMe), 69.9 (CH, C7''), 73.6 (CH, C2''), 73.7 (CH, C2''\*), 79.0 (CH, C3), 79.2 (CH, C3\*), 97.3 (CH, C6), 98.7 (CH, C4), 106.1 (quat., C5''), 106.8 (quat., C7a), 106.9 (quat., C7a\*), 127.9 (CH, C3'), 128.8 (CH, C3'\*), 129.0 (CH, C4'), 129.9 (CH, C4'\*), 155.1 (quat., C3a), 155.2 (quat., C3a\*), 159.6 (quat., C7), 166.7 (quat., C5), 168.5 (quat., C1); *m/z* (EI): 416 (M<sup>+</sup>, 3%), 398 (11), 316 (7), 262 (14), 207 (42), 193 (50), 155 (100), 137 (39), 111 (47), 98 (25), 95 (26), 55 (38), 41 (36); HRMS (EI): Found M<sup>+</sup>, 416.21999. C<sub>24</sub>H<sub>32</sub>O<sub>6</sub> requires *M*, 416.21989.

#### Notes

- The use of \* is used to denote either (*E*) or (*Z*) isomers.
- The ratio of (*E*):(*Z*) isomers was unable to be determined and was not relevant to the synthesis.

#### (3*R*, 2''*R*, 5''*R*, 7''*R*)-5,7-Dimethoxy-3-[5'-(2''-methyl-1'',6''-dioxaspiro[4.5]dec-7''-yl)pentyl]-3*H*-isobenzofuran-1-one (2)

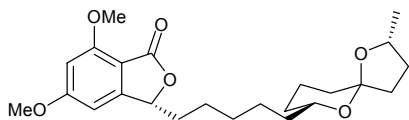

The above alkene (10 mg, 0.02 mmol) was dissolved in tetrahydrofuran (10 cm<sup>3</sup>) and stirred under a double balloon containing hydrogen in the presence of PtO<sub>2</sub> (1 mg) for 6 h. The catalyst was removed by filtration through a pad of Celite<sup>®</sup> and the solvent removed under reduced pressure. Purification of the resultant oil by flash column

# Supplementary Material (ESI) for Chemical Communications  
# This journal is © The Royal Society of Chemistry 2005

chromatography using pentane-diethyl ether (4:6-2:8) as the eluent gave the *title compound 2* (10 mg, 99%) as a yellow oil;  $[\alpha]_D +63.7$  ( $c$  0.85 in  $\text{CH}_3\text{Cl}$ ) (lit.<sup>2</sup>  $[\alpha]_D +62$  ( $c$  = 0.22,  $\text{CHCl}_3$ );  $\nu_{\text{max}}$ (film)/ $\text{cm}^{-1}$  2933, 2860, 1756s (CO), 1605s, 1494, 1459, 1432, 1336, 1218, 1158, 1052, 1029 and 980;  $\delta_{\text{H}}$  (400 MHz,  $\text{CDCl}_3$ ): 1.14 (1 H, dddd,  $J$  = 13.0, 13.0, 13.0 and 3.8 Hz,  $\text{H8}''_{\text{a}}$ ), 1.23 (3 H, d,  $J$  = 6.6 Hz, Me), 1.25-1.48 (7 H, m,  $\text{H3}'$ ,  $\text{H4}'$ ,  $\text{H5}'$  and  $\text{H3}''_{\text{a}}$ ), 1.51-1.56 (1 H, m,  $\text{H8}''_{\text{b}}$ ), 1.59-1.72 (4 H, m,  $\text{H1}'_{\text{a}}$ ,  $\text{H9}''_{\text{a}}$  and  $\text{H10}''$ ), 1.74 (1 H, ddd,  $J$  = 12.7, 10.4 and 6.6 Hz,  $\text{H4}''_{\text{a}}$ ), 1.80-1.89 (2 H, m,  $\text{H4}''_{\text{b}}$  and  $\text{H9}''_{\text{b}}$ ), 1.94-2.01 (1 H, m,  $\text{H1}'_{\text{b}}$ ), 2.12 (1 H, dddd,  $J$  = 11.9, 8.8, 6.6 and 6.6 Hz,  $\text{H3}''_{\text{b}}$ ), 3.66-3.72 (1 H, m,  $\text{H7}''$ ), 3.89 (3 H, s, OMe), 3.95 (3 H, s, OMe), 4.14 (1 H, qd,  $J$  = 6.6 and 6.6 Hz,  $\text{H2}''$ ), 5.30 (1 H, dd,  $J$  = 7.8 and 3.8 Hz,  $\text{H3}$ ), 6.40 (1 H, s,  $\text{H6}$ ), 6.42 (1 H, d,  $J$  = 1.7 Hz,  $\text{H4}$ );  $\delta_{\text{C}}$  (100 MHz,  $\text{CDCl}_3$ ): 20.4 ( $\text{CH}_2$ ,  $\text{C9}''$ ), 21.3 ( $\text{CH}_3$ , Me), 24.5 ( $\text{CH}_2$ ,  $\text{C2}'$ ), 25.4 ( $\text{CH}_2$ ,  $\text{C4}'$ ), 29.3 ( $\text{CH}_2$ ,  $\text{C3}'$ ), 30.9 ( $\text{CH}_2$ ,  $\text{C8}''$ ), 31.3 ( $\text{CH}_2$ ,  $\text{C3}''$ ), 33.5 ( $\text{CH}_2$ ,  $\text{C10}''$ ), 34.8 ( $\text{CH}_2$ ,  $\text{C1}'$ ), 36.1 ( $\text{CH}_2$ ,  $\text{C5}'$ ), 38.0 ( $\text{CH}_2$ ,  $\text{C4}''$ ), 55.9 ( $\text{CH}_3$ , OMe), 56.0 ( $\text{CH}_3$ , OMe), 69.9 (CH,  $\text{C7}''$ ), 73.9 (CH,  $\text{C2}''$ ), 79.9 (CH,  $\text{C3}$ ), 97.3 (CH,  $\text{C6}$ ), 98.6 (CH,  $\text{C4}$ ), 106.0 (quat.,  $\text{C5}''$ ), 107.0 (quat.,  $\text{C7a}$ ), 155.2 (quat.,  $\text{C3a}$ ), 159.6 (quat.,  $\text{C7}$ ), 166.6 (quat.,  $\text{C5}$ ), 168.5 (quat.,  $\text{C1}$ );  $m/z$  (EI): 418 ( $\text{M}^+$ , 6%), 361 (28), 318 (41), 293 (22), 290 (15), 261 (18), 207 (46), 193 (66), 155 (44), 111 (29), 98 (100), 57 (45), 55 (41), 43 (34), 41 (45); HRMS (EI): Found  $\text{M}^+$ , 418.23585.  $\text{C}_{24}\text{H}_{34}\text{O}_6$  requires  $M$ , 418.23554. This data was in agreement with that reported in the literature.<sup>1,2</sup>

1. For the  $^1\text{H}$  and  $^{13}\text{C}$  NMR data of natural spiroloxine methyl ether: M. A. Gaudliana, L. H. Huang, T. Kaneko, and P. C. Watts, *PCT Int. Appl.*, 1996, WO 9605204; CAN 125:58200.

2. For the IR and optical rotation  $+62^\circ$  ( $c$  = 0.22,  $\text{CHCl}_3$ ) of *semi-synthetic* spiroloxine methyl ether (prepared by methylation of natural spiroloxine): T. Adaci, I. Takagi, K. Kondo, A. Kawashima, A. Kobayashi, I. Taneoka, S. Morimoto, B. M. Hi, and Z. Chen, *PCT Int. Appl.*, 1996, WO 9610020; CAN 125:86482.

**(2'S)-((3S)-1-(*tert*-butyldiphenylsilyloxy)hept-6-en-3-yl)-3',3',3'-trifluoro-2'-methoxy-2'-phenylpropanoate**

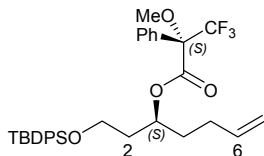

To a suspension of (*S*)-2-methoxy-2-trifluoromethyl-2-phenylacetic acid (48 mg, 0.20 mmol), 4-dimethylaminopyridine (3 mg, 0.03 mmol) and dicyclohexylcarbodiimide (70 mg, 0.34 mmol) in dichloromethane (1 cm<sup>3</sup>) was added alcohol (50 mg, 0.14 mmol) in dichloromethane (1 cm<sup>3</sup>). After stirring at room temperature for 72 h the reaction was quenched by the addition of brine (2 cm<sup>3</sup>). The mixture was diluted with diethyl ether (5 cm<sup>3</sup>) and the aqueous layer extracted with diethyl ether (3 x 5 cm<sup>3</sup>). The combined extracts were dried over magnesium sulfate, filtered and the solvent removed under reduced pressure. Flash column chromatography using hexane-diethyl ether (9:1) as the eluent gave the *title compound* (65 mg, 82%) as a colourless oil;  $\delta_{\text{H}}$  (300 MHz, CDCl<sub>3</sub>): 1.05 (9 H, s, Si<sup>t</sup>BuPh<sub>2</sub>), 1.67-1.74 (2 H, m, H4), 1.82-1.89 (2 H, m, H2), 1.90-2.02 (2 H, m, H5), 3.45 (3 H, s, OMe), 3.70 (2 H, t, *J* = 6.3 Hz, H1), 4.92-4.98 (2 H, m, H7), 5.36 (1 H, q, *J* = 6.2 Hz, H3), 5.71 (1 H, dddd, *J* = 17.6, 9.7, 6.5 and 6.5 Hz, H6), 7.38-7.42 (9 H, m, Si<sup>t</sup>BuPh<sub>2</sub>, *p* and *m* and ArH, *p* and *o* or *m*), 7.50-7.52 (2 H, m, ArH, *o* or *m*), 7.62-7.66 (4 H, m, Si<sup>t</sup>BuPh<sub>2</sub>, *o*);  $\delta_{\text{F}}$  (282 MHz, CDCl<sub>3</sub>) -72.47 (0.09F, CF<sub>3</sub>), -72.29 (2.91F, CF<sub>3</sub>). Integration of these resonances established the enantiomeric excess to be 94%.
